# Supplementary material for: Soziales Kompetenztraining in Virtueller Realität bei sozialer Angst
Source: Atypon-hosted journal article supplement (doi:10.1026/1616-3443/a000444), 2017-10-01
Supplement: 1616-3443_a000444_esm1.pdf [file 1616-3443_a000444_esm1.pdf]

## Elektronische Supplement 1

### Fragebogen zur Einschätzung der eigenen Kompetenz und der Bewertung der Realitätsnähe in VR

#### Szenario 1/2: [im Zugabteil, im Reisebüro]

|                                                                                                         | Trifft nicht zu          | Trifft eher nicht zu     | Trifft eher zu           | Trifft voll zu           |
|---------------------------------------------------------------------------------------------------------|--------------------------|--------------------------|--------------------------|--------------------------|
| Der Gesprächspartner [im Zug, im Reisebüro] hat auf mich insgesamt realistisch gewirkt. (Item 1)        | <input type="checkbox"/> | <input type="checkbox"/> | <input type="checkbox"/> | <input type="checkbox"/> |
| Der Gesprächspartner [im Zug, im Reisebüro] hat auf mich insgesamt abweisend gewirkt. (Item 2)          | <input type="checkbox"/> | <input type="checkbox"/> | <input type="checkbox"/> | <input type="checkbox"/> |
| Der Gesprächspartner [im Zug, im Reisebüro] hat auf mich insgesamt sozial inkompetent gewirkt. (Item 3) | <input type="checkbox"/> | <input type="checkbox"/> | <input type="checkbox"/> | <input type="checkbox"/> |
| Die Aussagen des Gesprächspartners [im Zug, im Reisebüro] waren realistisch. (Item 4)                   | <input type="checkbox"/> | <input type="checkbox"/> | <input type="checkbox"/> | <input type="checkbox"/> |
| In einer vergleichbaren realen Situation hätte ich mich ähnlich verhalten. (Item 5)                     | <input type="checkbox"/> | <input type="checkbox"/> | <input type="checkbox"/> | <input type="checkbox"/> |
| Ich war bereits in einer vergleichbaren realen Situation und habe mich ähnlich verhalten. (Item 6)      | <input type="checkbox"/> | <input type="checkbox"/> | <input type="checkbox"/> | <input type="checkbox"/> |
| In einer vergleichbaren realen Situation hätte ich schneller nachgegeben. (Item 7)                      | <input type="checkbox"/> | <input type="checkbox"/> | <input type="checkbox"/> | <input type="checkbox"/> |
| Ich habe nur getraut mich durchzusetzen, weil ich wusste, dass die Situation nicht real war. (Item 8)   | <input type="checkbox"/> | <input type="checkbox"/> | <input type="checkbox"/> | <input type="checkbox"/> |
| Ich habe mich insgesamt wie in einer vergleichbaren realen Situation gefühlt. (Item 9)                  | <input type="checkbox"/> | <input type="checkbox"/> | <input type="checkbox"/> | <input type="checkbox"/> |
| Ich habe mich insgesamt ängstlicher als in einer vergleichbaren realen Situation gefühlt. (Item 10)     | <input type="checkbox"/> | <input type="checkbox"/> | <input type="checkbox"/> | <input type="checkbox"/> |
| Ich habe mir Gedanken darüber gemacht, was der Gesprächspartner über mich denken könnte. (Item 11)      | <input type="checkbox"/> | <input type="checkbox"/> | <input type="checkbox"/> | <input type="checkbox"/> |
| Der Gedanke daran, was der Gesprächspartner über mich denkt, hat mich nervös gemacht. (Item 12)         | <input type="checkbox"/> | <input type="checkbox"/> | <input type="checkbox"/> | <input type="checkbox"/> |
| Mir war es wichtig, was der Gesprächspartner über mich denken könnte. (Item 13)                         | <input type="checkbox"/> | <input type="checkbox"/> | <input type="checkbox"/> | <input type="checkbox"/> |
| Wenn ich an mein Verhalten denke, fühle ich mich...                                                     |                          |                          |                          |                          |
| ...ärgerlich. (Item 14.1)                                                                               | <input type="checkbox"/> | <input type="checkbox"/> | <input type="checkbox"/> | <input type="checkbox"/> |
| ...zufrieden. (Item 14.2)                                                                               | <input type="checkbox"/> | <input type="checkbox"/> | <input type="checkbox"/> | <input type="checkbox"/> |
| ...glücklich. (Item 14.3)                                                                               | <input type="checkbox"/> | <input type="checkbox"/> | <input type="checkbox"/> | <input type="checkbox"/> |
