# Supplementary material for: Soziales Kompetenztraining in Virtueller Realität bei sozialer Angst
Source: Atypon-hosted journal article supplement (doi:10.1026/1616-3443/a000444), 2017-10-01
Supplement: 1616-3443_a000444_esm2.pdf [file 1616-3443_a000444_esm2.pdf]

## Elektronische Supplement 2

Der SPIN besteht aus 17 Items zur Erfassung von Angst, Vermeidung und physiologischen Symptomen der Sozialen Phobie aus der vorherigen Woche. Antworten werden auf einer 5-Punkte-Likert-Skala (von 0 = „überhaupt nicht“ bis 4 = „sehr stark“) angegeben. Die deutsche Version des SPINs hat für eine repräsentative deutsche Stichprobe eine sehr gute interne Konsistenz (Cronbach's Alpha = .95). Konvergente und divergente Validität sind zufriedenstellend. Des Weiteren ist der SPIN eine sensitive und spezifische Messmethode für Soziale Phobie, da erfolgreich zwischen Sozialer Phobie, anderen psychischen Erkrankungen und Gesundheit unterschieden werden kann (Sosic, Gieler, & Stangier, 2008).

Der SPAI umfasst 22 Items und erfasst somatische, kognitive sowie behaviorale Aspekte von Angst in sozialen Situationen. Die Antworten werden auf einer 7-Punkte-Likert-Skala (von 0 = „nie“ bis 6 = „immer“) angegeben. Der SPAI hat eine hohe interne Konsistenz (Cronbach's Alpha = .93 - .97) sowie Test-Retest-Reliabilität ( $r = .82$ ) und besitzt ausreichende konvergente und divergente Validität zu konstrukt-nahen bzw. -fernen Skalen. Des Weiteren wird angegeben, dass ab einem Wert von 2.60 mit >50 % Wahrscheinlichkeit die Kriterien für die Diagnose einer Sozialen Phobie erfüllt sind (Fydrich, 2002).

Der STAI besteht aus zwei Skalen, jeweils eine für die Erfassung der aktuellen Angst (State) und Angst als Disposition (Trait). Die Skalen sind unabhängig und bestehen aus jeweils 20 Items, die auf einer 4-stufigen Likert-Skala beantwortet werden. Für die deutsche Version des STAI liegt die interne Konsistenz (Cronbach's Alpha) für die Trait-Skala zwischen .88 und .94 und für die State-Skala zwischen .90 und .94 (Laux et al., 1981).

Der selbsterstellte Fragebogen zur Kompetenzeinschätzung erfasste das eigene Erleben und Verhalten während der Rollenspiele sowie die Bewertung der Realitätsnähe in VR. Unser Fragebogen besteht aus 14 Items mit einer 4-Punkte-Likert-Skala (von 1 = „trifft nicht zu“ bis 4 = „trifft voll zu“) zum eigenen Erleben beider Szenarien sowie aus 9 Items mit

einer Skala von 0 = „gar nicht“ bis 100 = „sehr stark“ zur Bewertung des eigenen Verhaltens in beiden Szenarien. Des Weiteren wurde das erlebte Blickkontaktverhalten der Agenten abgefragt. Der Fragebogen besteht aus zwei Teilen, die sich jeweils auf ein Rollenspiel in VR beziehen (siehe Anhang A).

Der IPQ besteht aus 14 Items und erfasst das Präsenzerleben in der virtuellen Welt. Der SSQ besteht aus 16 Items und misst mit einer 4-Punkte-Likert-Skala (von 0 = „gar nicht“ bis 3 = „schwer“) mögliche Nebenwirkungen der VR (z.B. Schwindelsymptome).
