# Supplementary material for: Soziales Kompetenztraining in Virtueller Realität bei sozialer Angst
Source: Atypon-hosted journal article supplement (doi:10.1026/1616-3443/a000444), 2017-10-01
Supplement: 1616-3443_a000444_esm3.pdf [file 1616-3443_a000444_esm3.pdf]

### Elektronische Supplement 3

Zur Kontrolle von möglichen Reihenfolgeeffekten der Präsentation der Szenarien wurde für die Angstratings eine 2 x 2 x 2 Varianzanalyse (ANOVA) für die Antizipationsangst mit dem Innersubjektfaktor Zeit (Angstabfrage jeweils vor dem Rollenspiel) und den Zwischensubjektfaktoren Gruppe (NSA vs. HSA) und Reihenfolge der Szenarien (Zugabteil/Reisebüro vs. Reisebüro/Zugabteil) durchgeführt. Des Weiteren wurde für die physiologischen Daten eine 4 x 2 x 2 ANOVA für die Angst in Rollenspiel mit dem Innersubjektfaktor Zeit (Rollenspiel Anfang 1, Rollenspiel Ende 1, Rollenspiel Anfang 2, Rollenspiel Ende 2) und den Zwischensubjektfaktoren Gruppe (NSA vs. HSA) und Reihenfolge der Szenarien (Zugabteil/Reisebüro vs. Reisebüro/Zugabteil) durchgeführt. Zur Kontrolle von möglichen Reihenfolgeeffekten der Präsentation des Blickkontakts wurden dieselben ANOVAs wie oben beschrieben durchgeführt, nur das anstatt der Szenarien der Innersubjektfaktor Blickkontakt (80% / 20% vs. 20% / 80%) verwendet wurde.

Für die Auswertung der Reihenfolge im Zusammenhang der Szenarien zeigten sich keine Reihenfolgeeffekte bei den Angstratings und der Hautleitfähigkeit (alle  $ps > .196$ ), und bei der HF nur eine signifikante Dreifachinteraktion Zeit x Gruppe x Szenario,  $F(3,153) = 3.87, p = .011, \eta^2 = .07$ . Die HF sinkt bei Personen, die zuerst im Zugabteil (Anfang:  $M = 105.5, SD = 19.4$  und Ende:  $M = 106.1, SD = 20.7$ ) und dann im Reisebüro (Anfang:  $M = 103.4, SD = 19.9$  und Ende:  $M = 99.6, SD = 19.8$ ) waren, während die HF bei Personen steigt, die zuerst im Reisebüro (Anfang:  $M = 100.5, SD = 17.9$  und Ende:  $M = 98.3, SD = 16.4$ ) und dann im Zugabteil (Anfang:  $M = 104.5, SD = 15.1$  und Ende:  $M = 101.4, SD = 18.2$ ) waren. Aufgrund der Ausbalancierung der Reihenfolge der Szenarien sollte der Effekt bei der HF die weiteren Ergebnisse nicht systematisch beeinflussen. Bei der Auswertung von Reihenfolgeeffekten im Zusammenhang mit der Variation des Blickkontakts ergaben sich keine signifikanten Effekte (alle  $ps > .059$ ).
