# Supplementary material for: Soziales Kompetenztraining in Virtueller Realität bei sozialer Angst
Source: Atypon-hosted journal article supplement (doi:10.1026/1616-3443/a000444), 2017-10-01
Supplement: 1616-3443_a000444_esm4.pdf [file 1616-3443_a000444_esm4.pdf]

## Elektronische Supplement 4

### Skalen des selbsterstellten Fragebogens zur Einschätzung der eigenen Kompetenz und der Bewertung der Realitätsnähe in VR

#### 1. Nervosität

- a. Nervöse Bewegungen
- b. Stottern
- c. Lange Pausen
- d. Zitternde Stimme
- e. Zittern des Körpers

#### 2. Selbstsicherheit

- a. Ungestörter Redefluss
- b. Klare, deutliche Stimme
- c. Selbstsicherheit

#### 3. Relevanz des Eindrucks auf Interaktionspartner

- a. Ich habe mir Gedanken darüber gemacht, was der Gesprächspartner über mich denken könnte (Item 11)
- b. Der Gedanke daran, was der Gesprächspartner über mich denkt, hat mich nervös gemacht (Item 12)
- c. Mir war es wichtig, was der Gesprächspartner über mich denken könnte (Item 13)

#### 4. Realitätsnähe des Interaktionspartners

- a. Gesprächspartner hat insgesamt realistisch gewirkt (Item 1)
- b. Aussagen des Gesprächspartners waren realistisch (Item 4)

#### 5. Realitätsnähe des eigenen Verhaltens

- a. In einer vergleichbaren realen Situation hätte ich mich ähnlich verhalten (Item 5 - umgepolt)
- b. In einer vergleichbaren realen Situation hätte ich schneller nachgegeben (Item 7)
- c. Ich habe nur getraut mich durchzusetzen, weil ich wusste, dass die Situation nicht real war (Item 8)
