# Supplementary material for: Soziales Kompetenztraining in Virtueller Realität bei sozialer Angst
Source: Atypon-hosted journal article supplement (doi:10.1026/1616-3443/a000444), 2017-10-01
Supplement: 1616-3443_a000444_esm5.pdf [file 1616-3443_a000444_esm5.pdf]

## Elektronische Supplement 5

### Faktorenanalyse für den Fragebogen zur Einschätzung der eigenen Kompetenz sowie der Bewertung der Realitätsnähe in VR

*Tabelle 1.*

*Ergebnisse der Hauptkomponentenanalyse für den Fragebogen zur Einschätzung der eigenen Kompetenz sowie der Bewertung der Realitätsnähe in VR*

|           | Zugabteil   |              |             |             |              | Reisebüro   |              |             |             |              |
|-----------|-------------|--------------|-------------|-------------|--------------|-------------|--------------|-------------|-------------|--------------|
|           | 1           | 2            | 3           | 4           | 5            | 1           | 2            | 3           | 4           | 5            |
| Item 1    | .437        | .353         | .022        | <b>.467</b> | -.134        | .301        | -.068        | <b>.748</b> | -.173       | .025         |
| Item 2    | -.006       | -.091        | <b>.850</b> | .079        | .225         | .034        | .232         | -.220       | <b>.750</b> | -.022        |
| Item 3    | .067        | .103         | <b>.865</b> | -.136       | -.053        | .316        | -.050        | -.756       | <b>.864</b> | -.062        |
| Item 4    | -.077       | .099         | -.093       | <b>.904</b> | .015         | -.057       | .038         | <b>.742</b> | -.103       | -.169        |
| Item 5    | .129        | <b>.691</b>  | .077        | .215        | -.107        | .138        | <b>-.681</b> | -.151       | .041        | .072         |
| Item 6    | -.309       | .470         | -.223       | .135        | .120         | -.050       | -.457        | .001        | .641        | -.083        |
| Item 7    | .050        | <b>-.894</b> | -.024       | -.022       | .016         | .036        | <b>.754</b>  | -.105       | .128        | .118         |
| Item 8    | .085        | <b>-.785</b> | .005        | .035        | .256         | .184        | <b>.702</b>  | -.356       | .015        | -.091        |
| Item 9    | .297        | .711         | -.006       | .121        | .087         | .198        | -.352        | .631        | .298        | .211         |
| Item 10   | -.009       | .075         | -.024       | .073        | <b>.773</b>  | -.034       | -.211        | -.072       | .038        | <b>.873</b>  |
| Item 11   | <b>.917</b> | .046         | .014        | -.114       | .112         | <b>.904</b> | -.067        | -.029       | -.009       | .075         |
| Item 12   | <b>.927</b> | .038         | .031        | -.051       | .025         | <b>.908</b> | .032         | -.008       | .046        | .058         |
| Item 13   | <b>.826</b> | .047         | .033        | .065        | .162         | <b>.877</b> | .067         | .012        | .035        | -.079        |
| Item 14.1 | .353        | -.238        | -.098       | -.382       | .343         | .464        | .409         | .012        | .520        | .175         |
| Item 14.2 | .466        | -.181        | .172        | .083        | .599         | .498        | .532         | .084        | .091        | .415         |
| Item 14.3 | -.119       | .166         | -.164       | .295        | <b>-.787</b> | -.110       | -.431        | -.071       | .109        | <b>-.709</b> |

Anmerkung. Rotationsmethode: Varimax mit Kaiser-Normalisierung. Die Rotation ist in 6 Iterationen konvergiert. Die zusammengefassten Items sind fett gedruckt.

*Tabelle 2.*

*Ergebnisse der Hauptkomponentenanalyse für Skalen Nervosität und Selbstsicherheit*

|                         | Zugabteil   |             | Reisebüro   |             |
|-------------------------|-------------|-------------|-------------|-------------|
|                         | 1           | 2           | 1           | 2           |
| Nervöse Bewegungen      | <b>.803</b> | -.177       | <b>.785</b> | -.206       |
| Stottern                | <b>.705</b> | -.374       | <b>.777</b> | -.304       |
| Lange Pausen            | <b>.718</b> | -.328       | <b>.708</b> | -.449       |
| Zitternde Stimme        | <b>.851</b> | -.321       | <b>.867</b> | -.223       |
| Zittern des Körpers     | <b>.834</b> | .003        | <b>.735</b> | -.266       |
| Nervosität              | .699        | -.480       | .506        | -.668       |
| Ungestörter Redefluss   | -.099       | <b>.782</b> | -.096       | <b>.813</b> |
| Klare, deutliche Stimme | -.405       | <b>.801</b> | -.515       | <b>.669</b> |
| Selbstsicherheit        | -.221       | <b>.862</b> | -.333       | <b>.801</b> |

Anmerkung. Rotationsmethode: Varimax mit Kaiser-Normalisierung. Die Rotation ist in 6 Iterationen konvergiert. Die zusammengefassten Items sind fett gedruckt.
