# Supplementary material for: Soziales Kompetenztraining in Virtueller Realität bei sozialer Angst
Source: Atypon-hosted journal article supplement (doi:10.1026/1616-3443/a000444), 2017-10-01
Supplement: 1616-3443_a000444_esm6.pdf [file 1616-3443_a000444_esm6.pdf]

**Elektronische Supplement 6**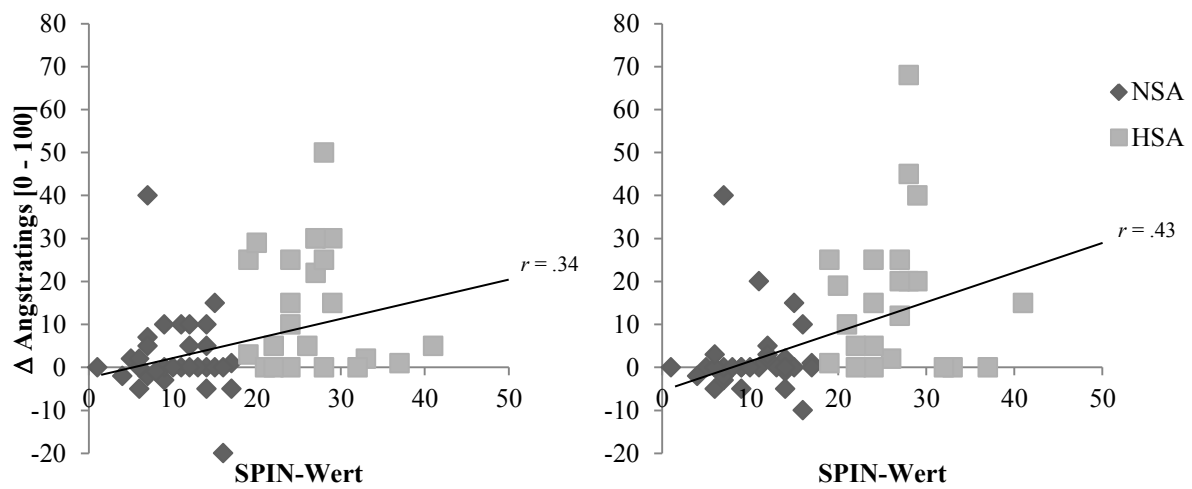

**Abbildung 1. Zusammenhang zwischen Angstrating und SPIN-Wert in beiden Szenarien.** Die Abbildung zeigt den Zusammenhang zwischen der Differenz der subjektiv berichteten Angst zur Baseline und dem SPIN-Wert für niedriger (NSA) und höher (HSA) sozial ängstliche Personen im Zugabteil (links) und Reisebüro (rechts). Die schwarze Linie zeigt die lineare Trendlinie mit dem Korrelationskoeffizienten ( $r$ ) über alle Probanden an.
